# Supplementary material for: Haploinsufficient Rock1+/− and Rock2+/− Mice Are Not Protected from Cardiac Inflammation and Postinflammatory Fibrosis in Experimental Autoimmune Myocarditis
Source: PubMed Central journal article supplement (PMC7140701; doi:10.3390/cells9030700), 2020-03-12
Supplement: cells-09-00700-s001.pdf [file cells-09-00700-s001.pdf]

Supplementary materials

A

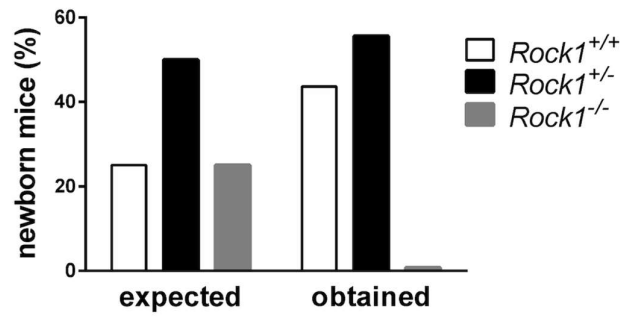

B

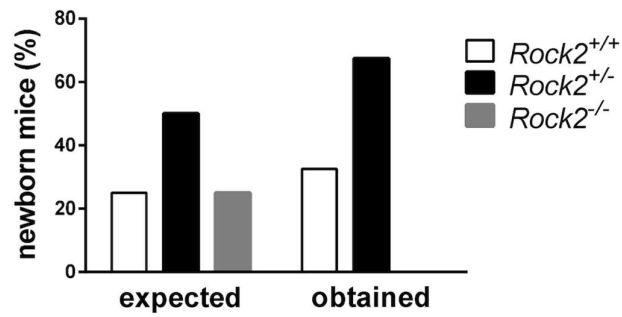

**Figure 1. Genotype of *Rock1*<sup>-/-</sup> and *Rock2*<sup>-/-</sup> offspring.** Percentages of expected (left) and actual (right) genotypes of newborn mice obtained from haploinsufficient breedings of *Rock1*<sup>+/+</sup> x *Rock1*<sup>+/-</sup> (n=252, A) and *Rock2*<sup>+/+</sup> x *Rock2*<sup>+/-</sup> (n=227, B).

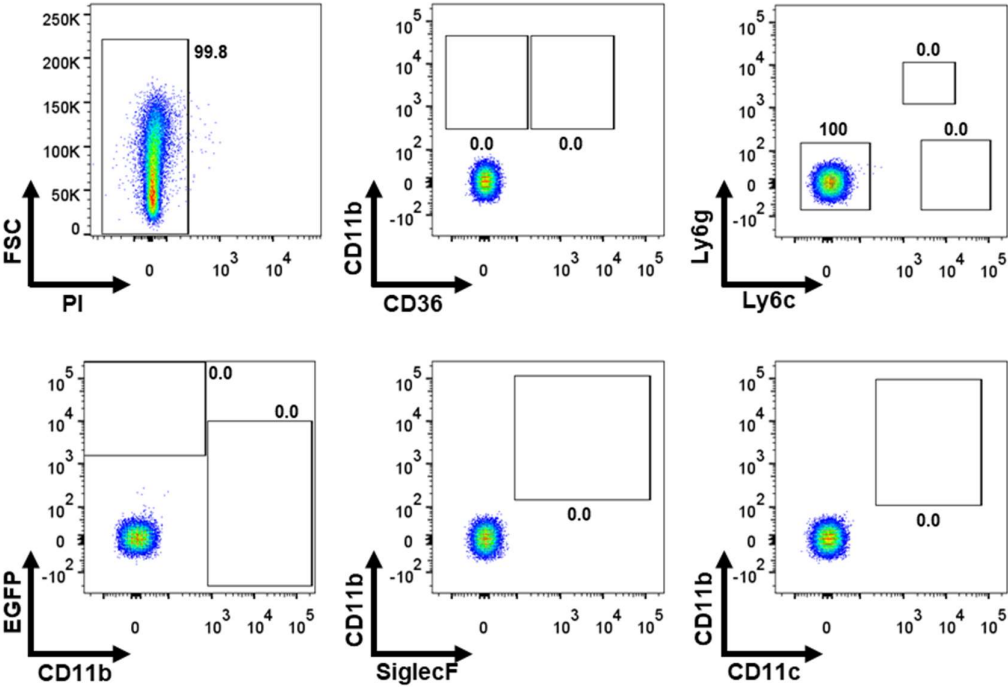

**Figure 2. Flow cytometry analysis of unstained mouse heart.** Gating strategy for myeloid cell subsets and cardiac fibroblasts in flow cytometry analysis of unstained samples of heart from wild-type mice.

**Table 1. Oligonucleotide sequences used in quantitative RT-PCR.** Forward and reverse sequences of oligonucleotides complementary to transcripts of the analyzed genes used in quantitative RT-PCR experiments.

| Gene           | F primer sequence       | R primer sequence       |
|----------------|-------------------------|-------------------------|
| <i>Acta2</i>   | GCCATCTTTCATTGGGATGGAG  | ACAGGACGTTGTTAGCATAGAGA |
| <i>Coll1a1</i> | ACCGATGGATTCCCGTTCG     | CATTAGGCGCAGGAAGGTCA    |
| <i>Fn1</i>     | GAACGACACGTTCCACAAGC    | CACTGGTCAATGGGGTCACA    |
| <i>Nox4</i>    | TGGCCAACGAAGGGGTAAA     | ACACAATCCTAGGCCCAACA    |
| <i>Postn</i>   | AGACTGCTTCAGGGAGACAC    | ACGGCCTTCTCTTGATCGTC    |
| <i>Vim</i>     | CGAGAGAAATTGCAGGAGGAGA  | CGTTCAAGGTCAAGACGTGC    |
| <i>Mmp2</i>    | CCCCCATGAAGCCTTGTTTAC   | TACAGCTGTTGTAGGAGGTGC   |
| <i>Mmp9</i>    | AGCGCCAGCCGACTTTT       | TAGCGGTACAAGTATGCCTCTG  |
| <i>Rock1</i>   | AAGCTTGCAGGAAAGTTTACAGA | AAGTTCTGCATTTCTGCTCCA   |
| <i>Gapdh</i>   | GTCCCAGCTTAGGTTTCATCAGG | ACGGCCAAATCCGTTACAC     |

**Table S2. Quantification of cardiac inflammatory cells in *Coll-EGFP* and *Coll-EGFP x Rock1<sup>+/-</sup>* mice at d21 of EAM.** Table presents percentages and absolute numbers (mean value  $\pm$ SEM) of analyzed cells populations in *Coll-EGFP* and *Coll-EGFP x Rock1<sup>+/-</sup>* mice hearts at day 21 of EAM. EGFP<sup>+</sup> cardiac fibroblasts and inflammatory CD11b<sup>+</sup> myeloid cells were analyzed on total single cells (total EGFP<sup>+</sup> and total CD11b<sup>+</sup>) and on myeloid cell subsets gated on inflammatory CD11b<sup>+</sup> myeloid cells as presented in the Figure 2.

|                                                                             | Coll-EGFP           |                       | Coll-EGFP x ROCK1 <sup>+/-</sup> |                       |
|-----------------------------------------------------------------------------|---------------------|-----------------------|----------------------------------|-----------------------|
|                                                                             | Percentage          | Absolute number       | Percentage                       | Absolute number       |
| <b>Total EGFP<sup>+</sup></b>                                               | 16.75 ( $\pm$ 1.90) | 160227 ( $\pm$ 31014) | 14.58 ( $\pm$ 1.55)              | 113528 ( $\pm$ 17536) |
| <b>Total CD11b<sup>+</sup></b>                                              | 8.74 ( $\pm$ 1.48)  | 102551 ( $\pm$ 30873) | 7.90 ( $\pm$ 1.05)               | 67604 ( $\pm$ 12209)  |
| <b>CD11b<sup>+</sup>-gated cells</b>                                        |                     |                       |                                  |                       |
| <b>CD11b<sup>+</sup> CD36<sup>+</sup></b>                                   | 34.81 ( $\pm$ 6.30) | 288789 ( $\pm$ 6146)  | 35.53 ( $\pm$ 5.68)              | 21948 ( $\pm$ 3553)   |
| <b>CD11b<sup>+</sup> CD36<sup>+</sup> Ly6g<sup>+</sup> Ly6c<sup>+</sup></b> | 21.28 ( $\pm$ 2.49) | 25045 ( $\pm$ 9719)   | 20.21 ( $\pm$ 1.24)              | 14148 ( $\pm$ 2910)   |
| <b>CD11b<sup>+</sup> CD36<sup>-</sup> Ly6g<sup>-</sup> Ly6c<sup>-</sup></b> | 22.81 ( $\pm$ 3.20) | 20630 ( $\pm$ 50870)  | 26.21 ( $\pm$ 4.01)              | 15936 ( $\pm$ 2146)   |
| <b>CD11b<sup>+</sup> CD36<sup>-</sup> Ly6g<sup>+</sup> Ly6c<sup>+</sup></b> | 15.07 ( $\pm$ 2.23) | 17216 ( $\pm$ 6399)   | 14.97 ( $\pm$ 1.60)              | 10528 ( $\pm$ 2457)   |
| <b>CD11b<sup>+</sup> SiglecF<sup>+</sup></b>                                | 6.68 ( $\pm$ 1.16)  | 5970 ( $\pm$ 2110)    | 7.18 ( $\pm$ 1.16)               | 4190 ( $\pm$ 632)     |
| <b>CD11b<sup>+</sup> CD11c<sup>+</sup></b>                                  | 9.84 ( $\pm$ 1.26)  | 10671 ( $\pm$ 4775)   | 9.57 ( $\pm$ 1.67)               | 5361 ( $\pm$ 1645)    |
